# Supplementary material for: Multi-domain integrative Swin transformer network for sparse-view tomographic reconstruction
Source: PubMed Central journal article supplement — Patterns (N Y). 2022 Apr 22;3(6):100498. doi: 10.1016/j.patter.2022.100498 (PMC9214338; doi:10.1016/j.patter.2022.100498), 2022-04-22
Supplement: mmc1.pdf [file mmc1.pdf]

**Patterns, Volume 3**

**Supplemental information**

**Multi-domain integrative Swin  
transformer network for sparse-view  
tomographic reconstruction**

**Jiayi Pan, Heye Zhang, Weifei Wu, Zhifan Gao, and Weiwen Wu**

# Supplemental Experimental Procedures

## Appendix A

### More simulated data reconstructions

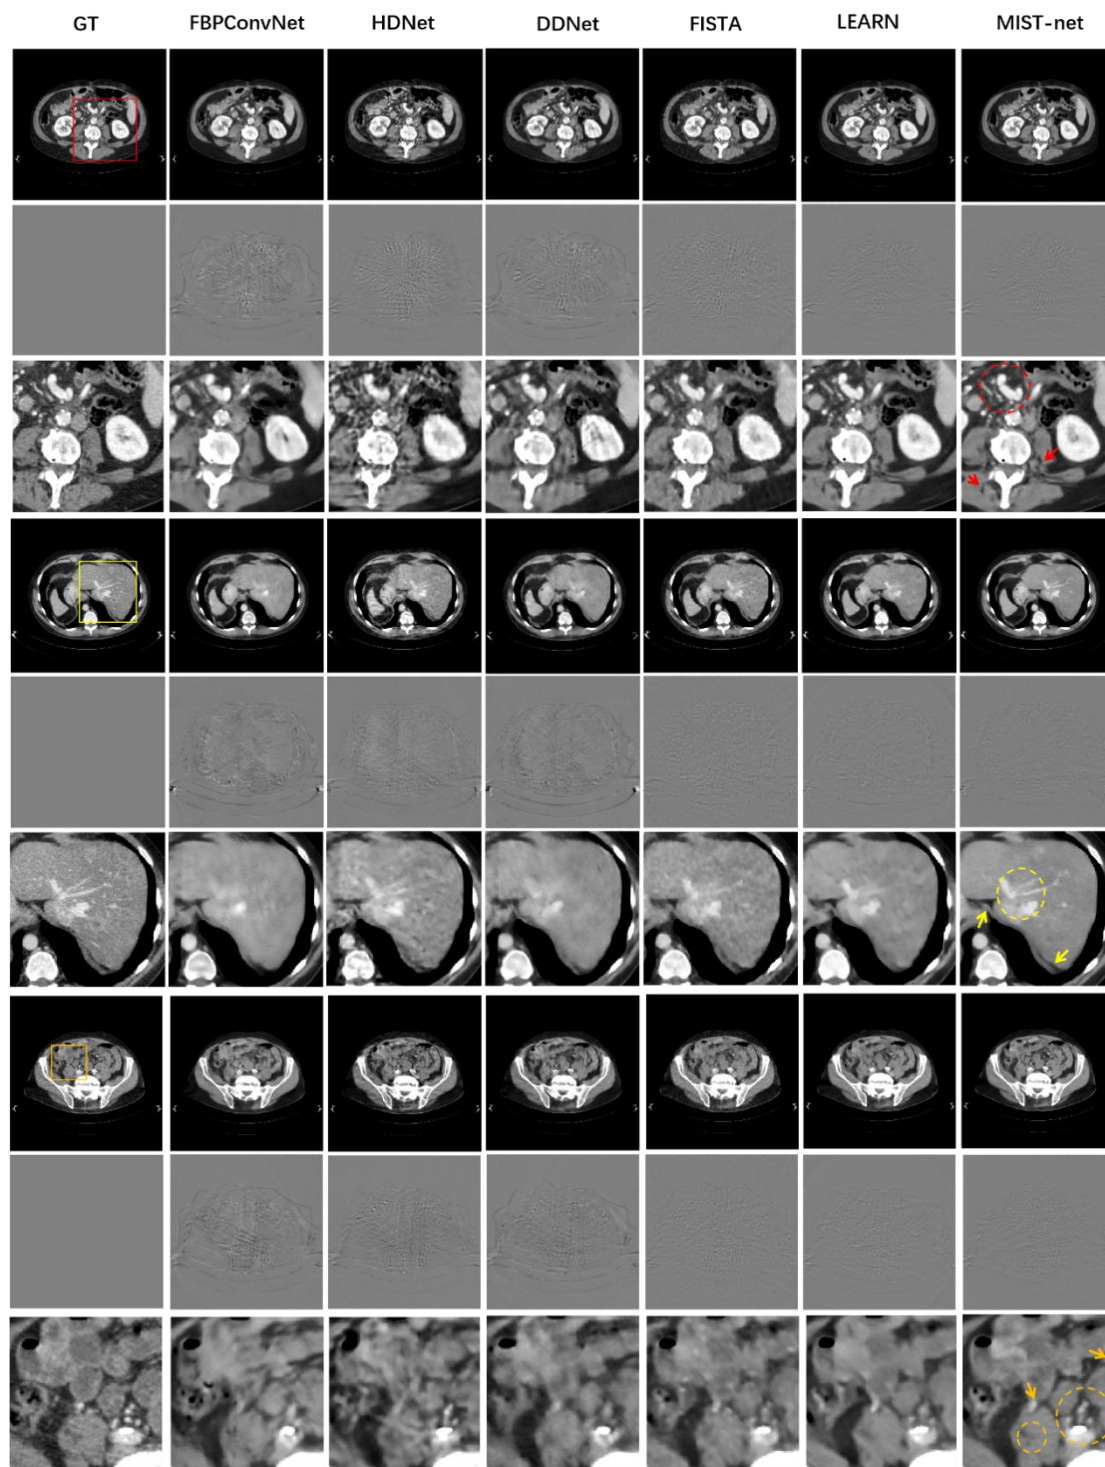

**Figure S1.** More simulated data reconstructions from sparse-view data by using different networks. The 1<sup>st</sup>-7<sup>th</sup> columns stand for the FBP reconstruction from full-view data, FBPconvNet, HDNet, DDNet, FISTA, LEARN and MIST-net counterparts from 48 views. The display windows for the reconstructed images are [-160 240] HU.

We also do the experiments on numerical datasets with 64 views. The results can be found in Figure S2.

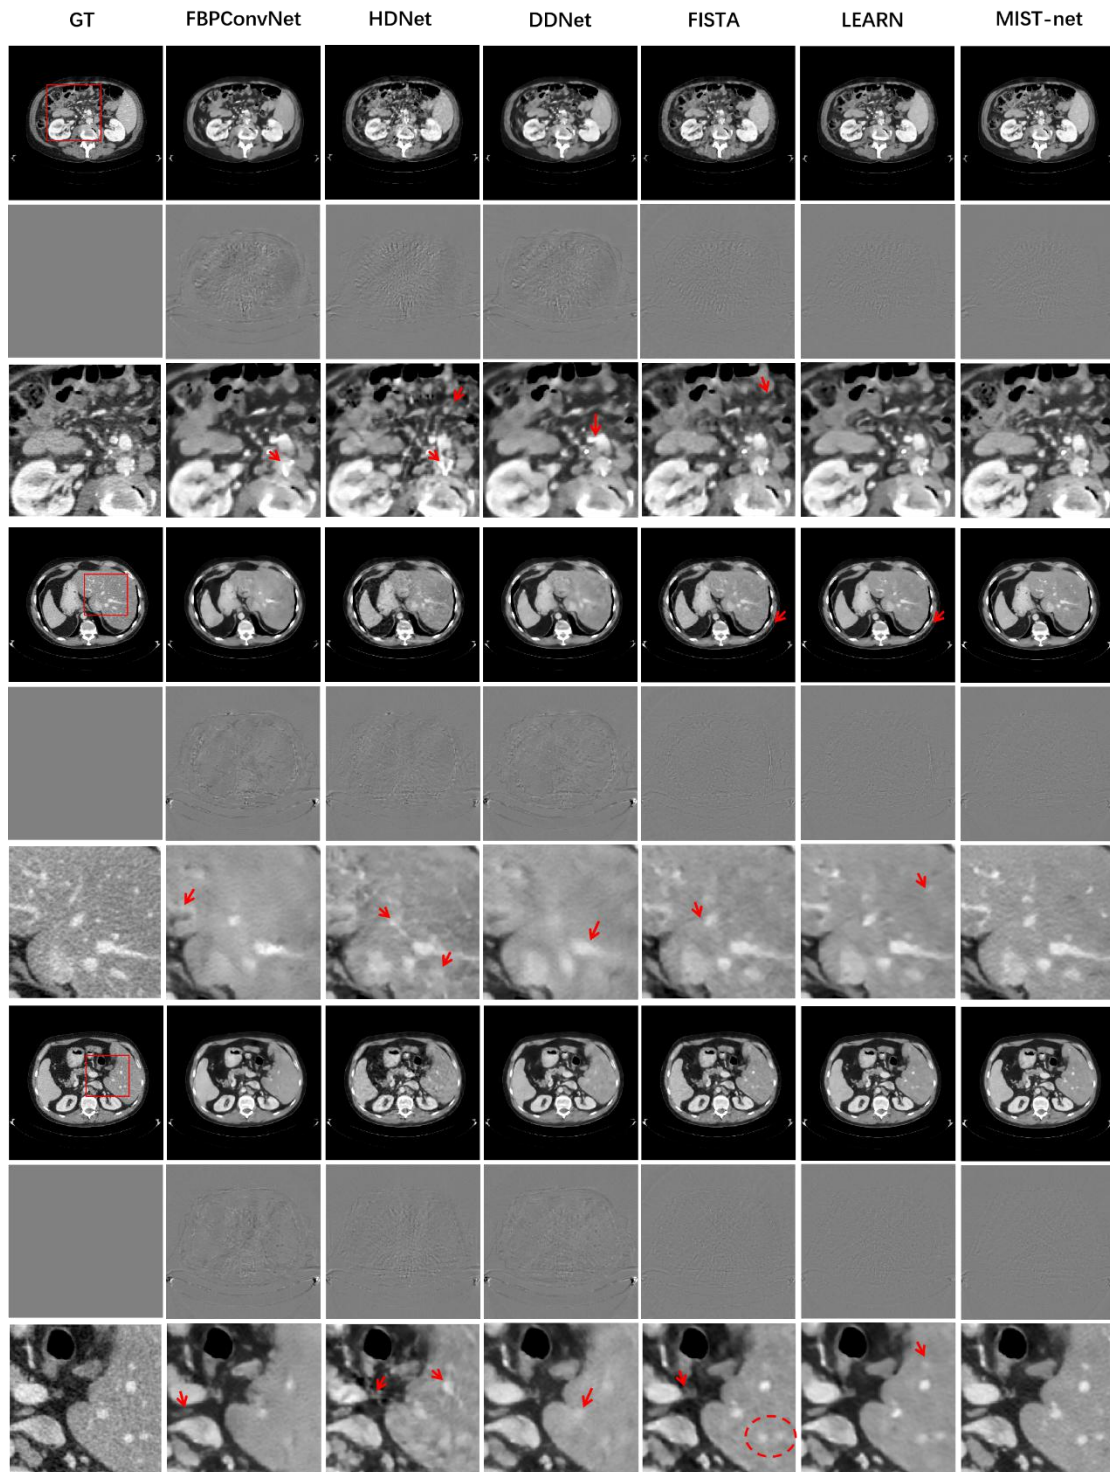

**Figure S2.** The simulated data reconstructions from 64 views by using different networks. The 1st-7th columns stand for the FBP reconstruction from full-view data, FBPconvNet, HDNet, DDNet, FISTA, LEARN and MIST-net. The display windows for the reconstructed images are [-160 240] HU.

## Appendix B

### *The statistical quantitative evaluations*

The statistical quantitative evaluations result from testing datasets were computed in terms of RMSE, PSNR and SSIM, and their results were summarized in Table S1. It can be seen that our MIST-net can obtain the best quantitative statistical results in terms of mean and standard deviation than other competitors.

Table S1

Quantitative evaluation of 64 projections reconstruction results from simulated testing datasets

| Views | Methods    | RMSE                                   | PSNR                                   | SSIM                                   |
|-------|------------|----------------------------------------|----------------------------------------|----------------------------------------|
| 64    | FBPconvNet | 25.9083 $\pm$ 4.5941                   | 38.6168 $\pm$ 1.6026                   | 0.9634 $\pm$ 0.0174                    |
|       | HDNet      | 22.8740 $\pm$ 4.2488                   | 39.2675 $\pm$ 1.2331                   | 0.9670 $\pm$ 0.0144                    |
|       | DDNet      | 24.1746 $\pm$ 4.7592                   | 39.7018 $\pm$ 1.3685                   | 0.9655 $\pm$ 0.0163                    |
|       | FISTA      | 17.4884 $\pm$ 3.1788                   | 42.0121 $\pm$ 1.2369                   | 0.9769 $\pm$ 0.0100                    |
|       | LEARN      | 15.9171 $\pm$ 3.6576                   | 42.8622 $\pm$ 1.3997                   | 0.9814 $\pm$ 0.0123                    |
|       | MIST-net   | <b>14.5492 <math>\pm</math> 3.2807</b> | <b>43.6418 <math>\pm</math> 1.4070</b> | <b>0.9844 <math>\pm</math> 0.00101</b> |

In addition to the performance metrics, we also compare the complexity and runtime of all competitors. The test time represents the time taken to predict a total of 391 test datasets. Table S2 shows that our MIST-net train and test much faster than LEARN and FISTA.

Table S2

Time-consuming comparison of different methods (48 projections)

| Views |             | FBPconvNet       | HDNet             | DDNet            | FISTA            | LEARN            | MIST-net         |
|-------|-------------|------------------|-------------------|------------------|------------------|------------------|------------------|
| 48    | Epochs      | 150              | 150( $\times$ 2)  | 100              | 40               | 40               | 40               |
|       | Input Size  | 512 $\times$ 512 | 48 $\times$ 880   | 512 $\times$ 512 | 48 $\times$ 880  | 48 $\times$ 880  | 48 $\times$ 880  |
|       | Output Size | 512 $\times$ 512 | 512 $\times$ 512  | 512 $\times$ 512 | 512 $\times$ 512 | 512 $\times$ 512 | 512 $\times$ 512 |
|       | #Param.     | 9.8M             | 9.8M( $\times$ 2) | 6.4M             | 1.3M             | 3.0M             | 12.0M            |
|       | Train Time  | 21.3h            | 37.5h             | 41.2h            | 30.1h            | 83.1h            | 38.7h            |
|       | Test Time   | 40s              | 63s               | 66s              | 105s             | 316s             | 98s              |

## Appendix C

### More noise experiment results

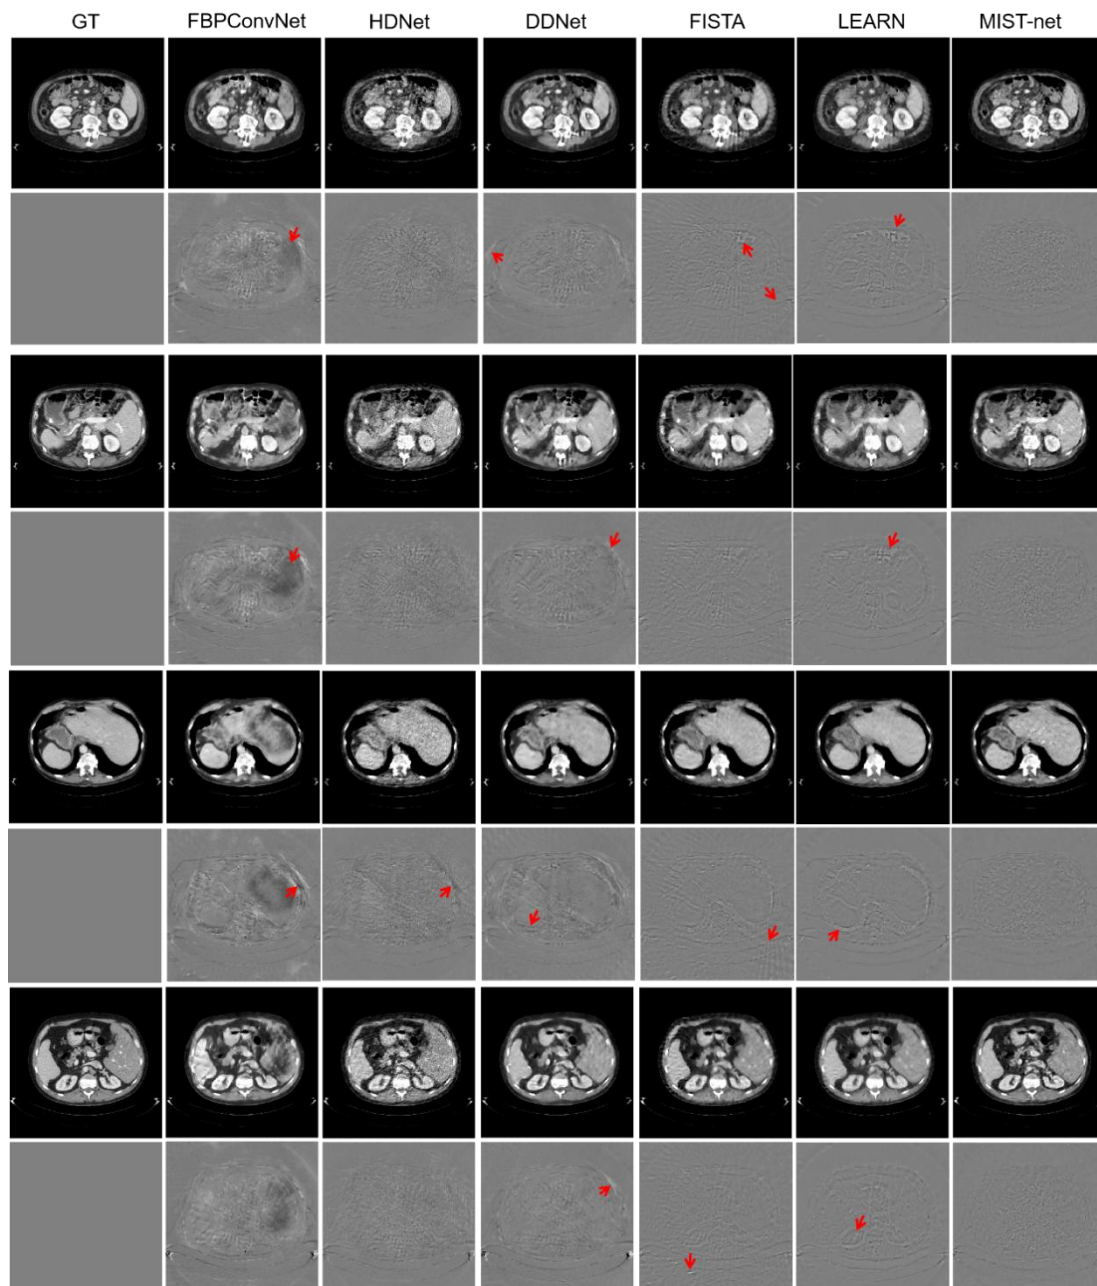

**Figure S3.** The generalization of different deep reconstruction networks against noise on simulation datasets. The 1<sup>st</sup>-7<sup>th</sup> columns stand for the ground truth, FBPconvNet, HDNet, DDNet, FISTA, LEARN and MIST-net from 48 views. The display window of reconstructed images is [-160 240] HU.

## Appendix D

### More network details

Table S3

Parametric structure for all the layers in the encoder-decoder block

| Layers | Parameters               | Input Channel | Output Channel |
|--------|--------------------------|---------------|----------------|
| A0     | 3×3Conv+BN+ReLU          | 1             | 32             |
|        | 3×3Conv+BN+ReLU          |               |                |
| A1     | 2×2 MaxPooling           | 32            | 64             |
|        | 3×3Conv+BN+ReLU          |               |                |
|        | 3×3Conv+BN+ReLU          |               |                |
| A2     | 2×2 MaxPooling           | 64            | 128            |
|        | 3×3Conv+BN+ReLU          |               |                |
|        | 3×3Conv+BN+ReLU          |               |                |
| A3     | 2×2 MaxPooling           | 128           | 256            |
|        | 3×3Conv+BN+ReLU          |               |                |
|        | 3×3Conv+BN+ReLU          |               |                |
| A4     | 2×2 MaxPooling           | 256           | 512            |
|        | 3×3Conv+BN+ReLU          |               |                |
|        | 3×3Conv+BN+ReLU          |               |                |
| B0     | Upsample+3×3Conv+BN+ReLU | 512           | 256            |
|        | Concatenation            |               |                |
|        | 3×3Conv+BN+ReLU          |               |                |
|        | 3×3Conv+BN+ReLU          |               |                |
| B1     | Upsample+3×3Conv+BN+ReLU | 256           | 128            |
|        | Concatenation            |               |                |
|        | 3×3Conv+BN+ReLU          |               |                |
|        | 3×3Conv+BN+ReLU          |               |                |
| B2     | Upsample+3×3Conv+BN+ReLU | 128           | 64             |
|        | Concatenation            |               |                |
|        | 3×3Conv+BN+ReLU          |               |                |
|        | 3×3Conv+BN+ReLU          |               |                |
| B3     | Upsample+3×3Conv+BN+ReLU | 64            | 32             |
|        | Concatenation            |               |                |
|        | 3×3Conv+BN+ReLU          |               |                |
|        | 3×3Conv+BN+ReLU          |               |                |
| B4     | 1 × 1 Convolution        | 32            | 1              |
| B5     | Residual Connection      | 1             | 1              |

Table S4

Parametric structure for all the layers in the edge enhancement Rec-network

| Layers | Parameters          | Input Channel | Output Channel |
|--------|---------------------|---------------|----------------|
| C0     | Sobel Convolution   | 1             | 32             |
|        | Concatenation       |               | 33             |
| C1     | 3×3Conv+ReLU        | 33            | 32             |
|        | 3×3Conv+ReLU        | 32            | 32             |
|        | Concatenation       |               | 65             |
| C2     | 3×3Conv+ReLU        | 65            | 32             |
|        | 3×3Conv+ReLU        | 32            | 32             |
|        | Concatenation       |               | 65             |
| C3     | 3×3Conv+ReLU        | 65            | 32             |
|        | 3×3Conv+ReLU        | 32            | 32             |
|        | Concatenation       |               | 65             |
| C4     | 3×3Conv+ReLU        | 65            | 32             |
|        | 3×3Conv+ReLU        | 32            | 32             |
|        | Concatenation       |               | 65             |
| C5     | 3×3Conv+ReLU        | 65            | 32             |
|        | 3×3Conv+ReLU        | 32            | 32             |
|        | Concatenation       |               | 65             |
| C6     | 3×3Conv+ReLU        | 65            | 32             |
|        | 3×3Conv+ReLU        | 32            | 32             |
|        | Concatenation       |               | 65             |
| C7     | 3×3Conv+ReLU        | 65            | 32             |
|        | 3×3Conv+ReLU        | 32            | 32             |
|        | Concatenation       |               | 65             |
| C8     | 3×3Conv+ReLU        | 65            | 32             |
|        | 3×3Conv             | 32            | 1              |
|        | Residual Connection | 1             | 1              |

Table S5

Parametric structure for all the layers in the Swin Rec-former

| Layers | Parameters                          | Window Size | Head Numbers | Head Numbers |
|--------|-------------------------------------|-------------|--------------|--------------|
| D0     | 3×3convolution                      |             |              |              |
| D1     | Patch-Embed Block                   | 8×8         | 6            | 1×1          |
|        | Swin Transformer Block (×6)         |             |              |              |
|        | Patch-UnEmbed Block                 |             |              |              |
|        | 3×3convolution+ Residual Connection |             |              |              |
| D2     | Patch-Embed Block                   | 8×8         | 6            | 1×1          |
|        | Swin Transformer Block (×6)         |             |              |              |
|        | Patch-UnEmbed Block                 |             |              |              |
|        | 3×3convolution+ Residual Connection |             |              |              |
| D3     | Patch-Embed Block                   | 8×8         | 6            | 1×1          |
|        | Swin Transformer Block (×6)         |             |              |              |
|        | Patch-UnEmbed Block                 |             |              |              |
|        | 3×3convolution+ Residual Connection |             |              |              |
| D4     | Patch-Embed Block                   | 8×8         | 6            | 1×1          |
|        | Swin Transformer Block (×6)         |             |              |              |
|        | Patch-UnEmbed Block                 |             |              |              |
|        | 3×3convolution+ Residual Connection |             |              |              |
| D5     | 3×3convolution+ Residual Connection |             |              |              |
